# Supplementary material
Source: PubMed Central journal article supplement (PMC4394306)
Supplement: pnas.201504279SI.pdf [file pnas.201504279SI.pdf]

# Supporting Information

Willinger et al. 10.1073/pnas.1504279112

## SI Materials and Methods

**Bone Marrow Chimeras.** Mixed bone marrow chimeras were generated as described (1).

**Flow Cytometry and Cell Sorting.** Single-cell suspensions were prepared from organs of mice at 6–12 wk of age. T cells were purified from spleen and lymph nodes by positive immunomagnetic selection using CD4 and CD8 beads (Miltenyi or Stemcell Technologies) and sorted as naive (CD44<sup>lo</sup>CD62L<sup>hi</sup>) CD4<sup>+</sup> and CD8<sup>+</sup> cells. Cells were stained with fluorochrome-labeled Abs (BioLegend): CD4 (RM4-5), CD8 $\alpha$  (53-6.7), TCR $\beta$  (H57-597), CD24 (M1/69), CD25 (3C7), CD44 (IM7), CD45.1 (A20), CD45.2 (104), CD62L (MEL-14), and CD69 (H1.2F3). Abs against CD5 (53-7.3) and CD98 (UM7F8) were from BD Biosciences. For intracellular flow cytometry, T cells were permeabilized with methanol as described (2) and stained with Abs (Cell Signaling Technology) against phosphorylated ribosomal protein S6<sup>Ser235/236</sup> (D57.2.2E), 4E-BP1<sup>Thr37/46</sup> (236B4), ERK<sup>Thr202/Y204</sup> (D13.14.4E), and Akt<sup>Thr308</sup> (C31E5E). Ab against phosphorylated STAT5<sup>Y694</sup>, Lck<sup>Y505</sup>, ZAP70<sup>Y319</sup>, p38<sup>Thr180/Y182</sup>, and JNK<sup>Thr183/Y185</sup> were from BD Biosciences.

**T-Cell Proliferation in Vivo.** Purified naive CD4 ( $1.5\text{--}2 \times 10^6$ ) or CD8 ( $0.5\text{--}1 \times 10^6$ ) T cells from *Dnm2* HET (CD45.1.2<sup>+</sup>) and KO (CD45.2<sup>+</sup>) mice were mixed 1:1 and cotransferred into *Rag1* KO mice (CD45.1<sup>+</sup>) by i.v. injection to measure lymphopenia-induced proliferation. To determine survival, a 1:1 mixture of naive CD4 ( $2.5\text{--}4 \times 10^6$ ) or CD8 ( $1.5\text{--}2 \times 10^6$ ) T cells from *Dnm2* HET (CD45.1.2<sup>+</sup>) and KO (CD45.2<sup>+</sup>) mice was adoptively transferred into C57BL/6 (B6) mice (CD45.1<sup>+</sup>) with a full lymphocyte compartment. In some experiments, cells were labeled with CFSE (5  $\mu$ M final concentration) before transfer. To analyze clonal expansion in response to foreign antigen,  $1 \times 10^5$  naive CD8 T cells from OT-I *Dnm2*<sup>fllox/fllox</sup> and OT-I *GzmB-creDnm2*<sup>fllox/fllox</sup> mice were mixed 1:1 and cotransferred into B6 mice. One day after transfer, recipient mice were infected i.v. with  $0.5\text{--}1 \times 10^5$  colony-forming units of LM-OVA.

**T-Cell Stimulation in Vitro.** Purified naive T cells were stimulated with plate-bound  $\alpha$ -CD3 Ab (10  $\mu$ g/mL unless indicated otherwise) and 5  $\mu$ g/mL soluble  $\alpha$ -CD28 Ab. Cells were cultured in 24-well plates at  $1\text{--}3 \times 10^6$ /mL in RPMI medium 1640 supplemented with 10% (vol/vol) FCS, 2 mM L-glutamine, 1% penicillin-streptomycin, and 55  $\mu$ M  $\beta$ -mercaptoethanol at 37 °C/5% CO<sub>2</sub>. To measure DNA synthesis, T cells ( $0.5\text{--}1 \times 10^5$  per well) were cultured in U-bottom 96-well plates in a final volume of 200  $\mu$ L for 24–72 h before being pulsed with 1  $\mu$ Ci <sup>3</sup>H-thymidine per well (Amersham) for a further 18 h. <sup>3</sup>H-thymidine-uptake was determined by liquid scintillation counting. Cell survival was determined by 7-AAD and annexin V staining. IL-7 (Peprotech) was used at 10 ng/mL. In some experiments, T cells were treated with the indicated concentration of the lysosomal inhibitor bafilomycin A1 (BafA1).

**TCR Down-Modulation.** Splenocytes were incubated with 10  $\mu$ g/mL plate-bound  $\alpha$ -CD3 Ab for the indicated time points at 37 °C/5% CO<sub>2</sub>. After washing, cells were stained for flow cytometric analysis with antibodies against CD4, CD8, and TCR $\beta$ . Percent receptor down-modulation was calculated as follows:  $100 \times [\text{MFI}(\text{cells on ice}) - \text{MFI}(\text{cells incubated with } \alpha\text{-CD3 Ab})]/\text{MFI}(\text{cells on ice})$ .

**Quantitative RT-PCR.** Total RNA was extracted from purified cells with TRIzol reagent (Invitrogen) and used for cDNA synthesis with the SuperScript First-Strand Synthesis System (Invitrogen). Quantitative RT-PCR was performed on a 7500 fast real-time PCR system with primer-probe sets purchased from ABL.

**Western Blot.** Cell lysates were prepared in cell lysis buffer (Cell Signaling Technology) and proteins separated by SDS/PAGE using 4–12% Bis-Tris gels (Invitrogen). The following antibodies were used for immunoblotting (Cell Signaling Technology unless otherwise stated): c-Myc, phospho-S6K1/S6K1, phospho-Akt<sup>Ser473</sup>/Akt, phospho-AMPK $\alpha$ <sup>Thr172</sup>/AMPK $\alpha$ , phospho-Tsc2<sup>Ser939</sup>/phospho-Tsc2<sup>Ser1387</sup>/Tsc2, phospho-Raptor<sup>Ser792</sup>/Raptor, LC3B (MBL), Glut1 (Geoff Holman, University of Bath, Bath, United Kingdom), and actin (Santa Cruz Biotechnology).

1. Willinger T, Ferguson SM, Pereira JP, De Camilli P, Flavell RA (2014) Dynamain 2-dependent endocytosis is required for sustained S1PR1 signaling. *J Exp Med* 211(4): 685–700.

2. Willinger T, Freeman T, Hasegawa H, McMichael AJ, Callan MF (2005) Molecular signatures distinguish human central memory from effector memory CD8 T cell subsets. *J Immunol* 175(9):5895–5903.



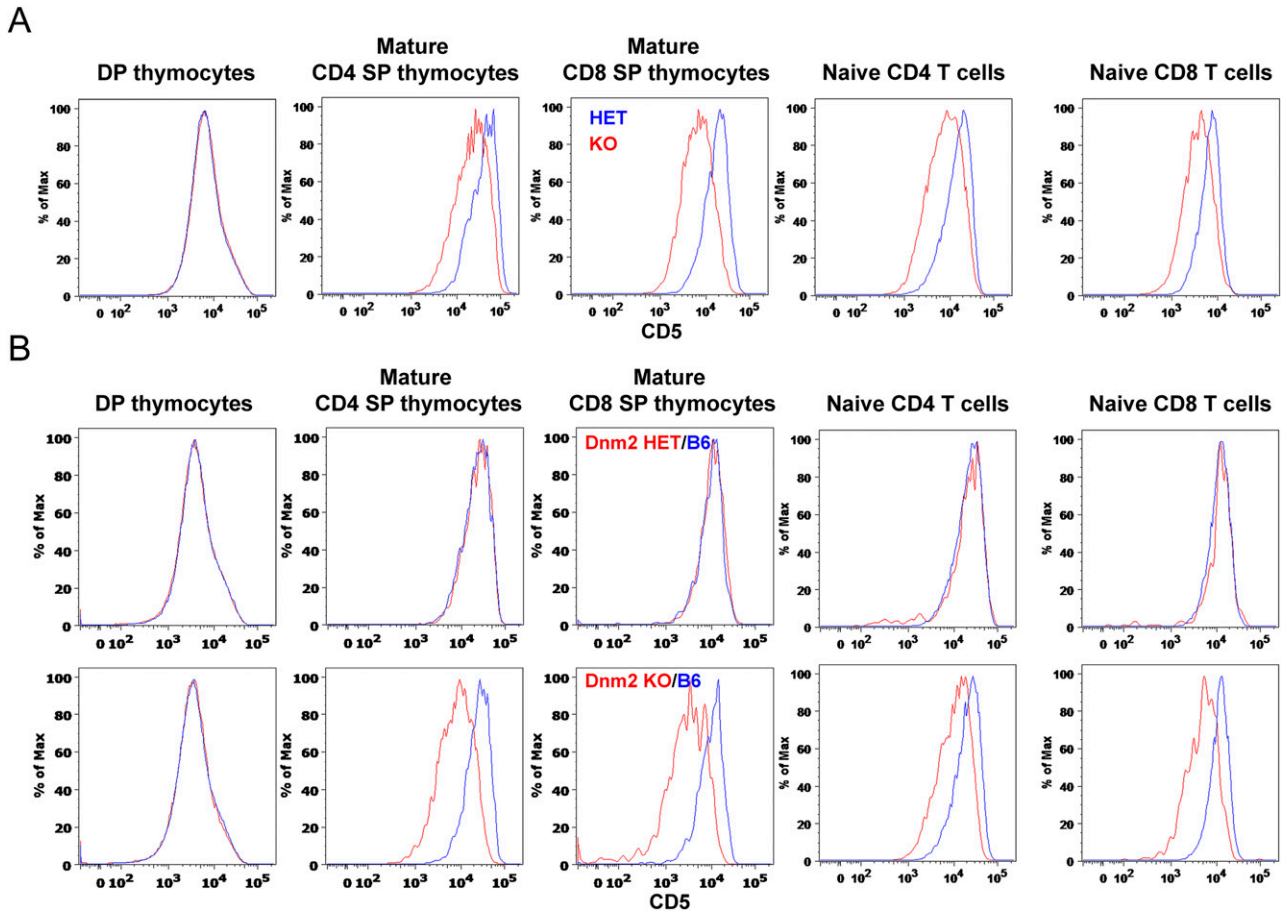

**Fig. S2.** Dynamin 2 deficiency causes reduced TCR signaling strength. (A) CD5 surface expression on thymocytes and peripheral CD4 and CD8 T cells from *Dnm2* HET and KO mice ( $n = 10$ ) was measured by flow cytometry. Histograms show CD5 expression on double-positive (DP) thymocytes and mature (TCR<sup>hi</sup>CD24<sup>lo</sup>) single-positive (SP) thymocytes, as well as naive (CD44<sup>lo</sup>CD62L<sup>hi</sup>) T cells. (B) Bone marrow cells from *Dnm2* HET or KO mice (CD45.2<sup>+</sup>) were mixed 1:1 with WT B6 cells (CD45.1<sup>+</sup>) and injected into irradiated *Rag1* KO recipients (CD45.1<sup>+</sup>) to generate bone marrow chimeras. CD5 surface expression on thymocytes and naive T cells from *Dnm2* HET/B6 and KO/B6 chimeras ( $n = 7$ ) was measured by flow cytometry. Results are representative of two (B) or three (A) experiments.



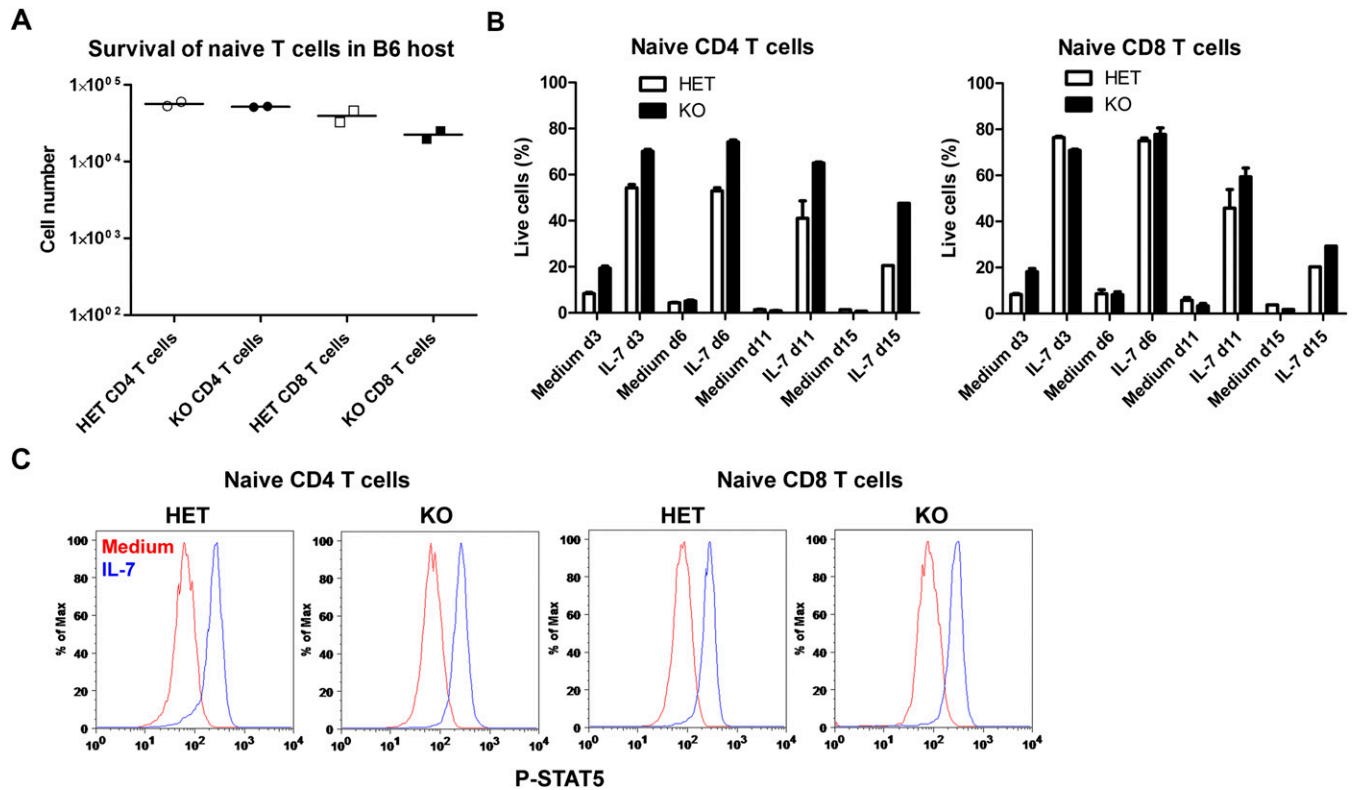

**Fig. 55.** Dynamin 2-deficient T cells have normal homeostatic survival and respond to IL-7 signals. (A) Naive CD4 or CD8 T cells from *Dnm2* HET (CD45.1.2<sup>+</sup>) and KO (CD45.2<sup>+</sup>) mice were mixed 1:1 and injected into B6 recipients (CD45.1<sup>+</sup>). Graph shows the number of transferred T cells that were recovered from spleen and lymph nodes 8 d after transfer. (B) Naive CD4 or CD8 T cells from *Dnm2* HET and KO mice were cultured in medium alone or in medium with 10 ng/mL IL-7. The frequency of live T cells (7-AAD<sup>-</sup> annexinV<sup>-</sup>) was determined by flow cytometry. (C) Phosphorylated STAT5 (P-STAT5) protein was measured in naive CD4 and CD8 T cells cultured in medium alone or stimulated with IL-7. Blue and red histograms represent HET and KO cells, respectively. Results are representative of or combined from two (A and C) or three (B) experiments.

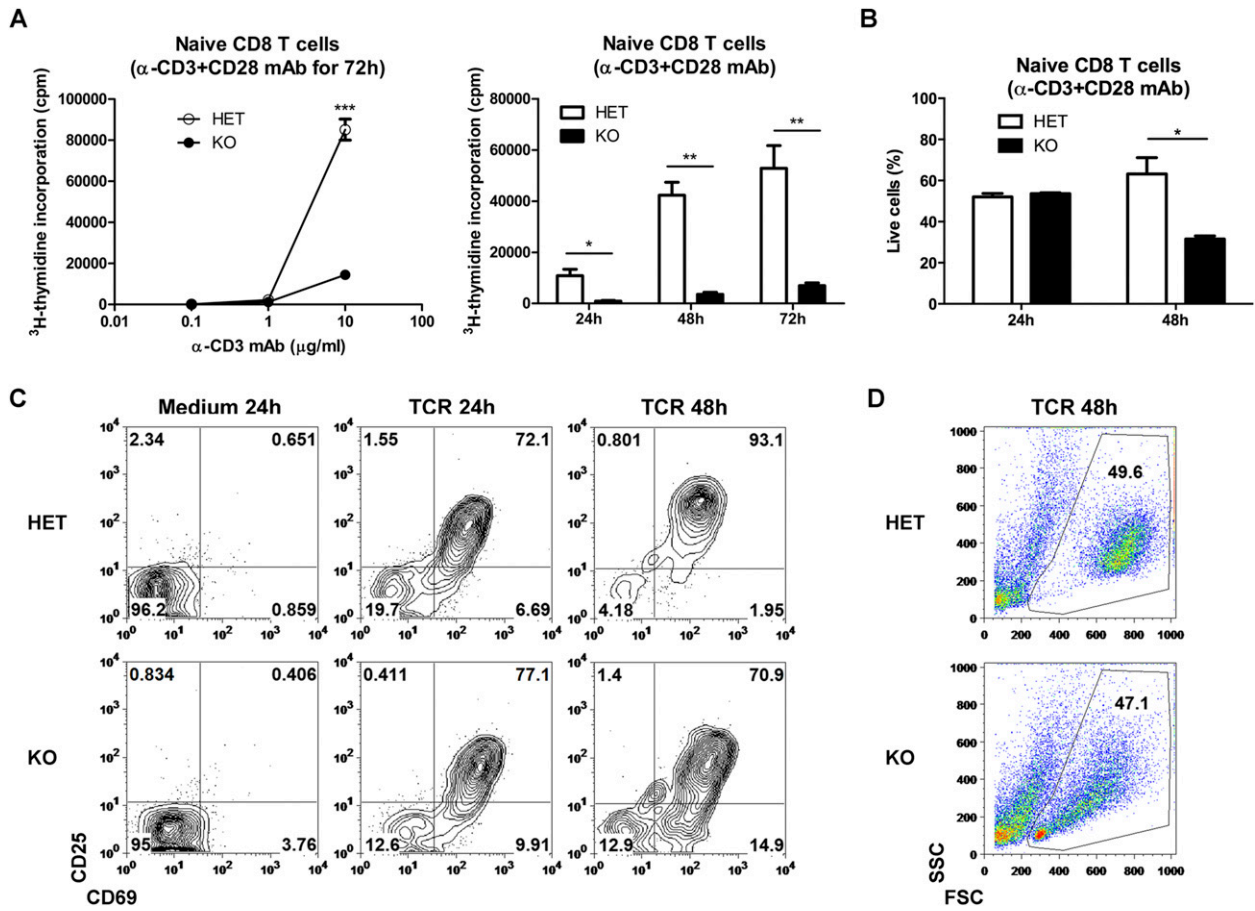

**Fig. S6.** Dynamin 2 supports the growth of naive CD8 T cells. Naive CD8 T cells from *Dnm2* HET and KO mice were stimulated with plate-bound  $\alpha$ -CD3 Ab and soluble  $\alpha$ -CD28 Ab in vitro. (A) DNA synthesis was measured in *Dnm2* HET and KO cells by  $^3$ H-thymidine incorporation as cpm. Graph on the *Left* shows DNA synthesis in naive CD8 T cells stimulated for 72 h with various concentrations of  $\alpha$ -CD3 Ab and with 5  $\mu$ g/mL  $\alpha$ -CD28 Ab. Graph on the *Right* shows DNA synthesis in naive CD8 T cells stimulated for the indicated times with 10  $\mu$ g/mL  $\alpha$ -CD3 Ab and 5  $\mu$ g/mL  $\alpha$ -CD28 Ab. (B) Frequency of live *Dnm2* HET and KO CD8 T cells 24 and 48 h after stimulation with 10  $\mu$ g/mL  $\alpha$ -CD3 Ab and 5  $\mu$ g/mL  $\alpha$ -CD28 Ab. Live cells were gated as 7-AAD<sup>-</sup>annexinV<sup>-</sup> cells using flow cytometry. (C) Flow cytometric analysis of CD25 and CD69 surface expression on *Dnm2* HET and KO CD8 T cells that were either unstimulated (medium) or stimulated with  $\alpha$ -CD3 and  $\alpha$ -CD28 Abs (TCR) for 24 and 48 h. Numbers next to outlined areas indicate the percentages of cells. (D) Representative dot plots showing forward scatter (FSC) and side scatter (SSC) profile of naive CD8 T cells from *Dnm2* HET and KO mice stimulated for 48 h with  $\alpha$ -CD3 and  $\alpha$ -CD28 Abs. All error bars represent SEM.  $P > 0.05$ ;  $*P < 0.05$ ;  $**P < 0.01$ ;  $***P < 0.001$  by unpaired Student's *t* test. Results are representative of or combined from three (B and C), four (A), or more than five (D) experiments.

A

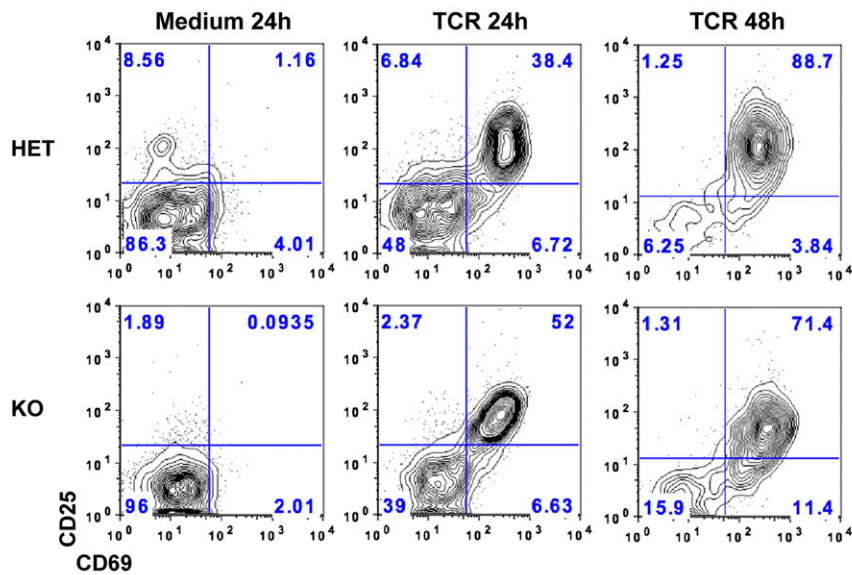

B

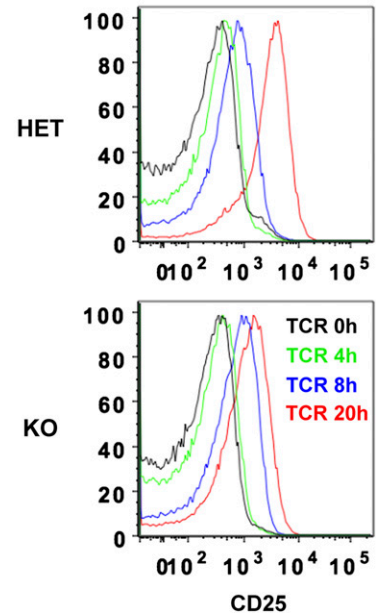

**Fig. S7.** Expression of activation markers in dynamin 2-deficient CD4 T cells. Naive CD4 T cells from *Dnm2* HET and KO mice were stimulated with plate-bound  $\alpha$ -CD3 Ab and soluble  $\alpha$ -CD28 Ab in vitro. (A) Flow cytometric analysis of CD25 and CD69 surface expression on *Dnm2* HET and KO CD4 T cells that were either unstimulated (medium) or stimulated with  $\alpha$ -CD3 and  $\alpha$ -CD28 Abs (TCR) for 24 and 48 h. Numbers next to outlined areas indicate the percentages of cells. (B) CD25 surface expression was determined in naive *Dnm2* HET and KO CD4 T cells activated with  $\alpha$ -CD3 and  $\alpha$ -CD28 mAbs for the indicated time periods. Results are representative of two experiments.





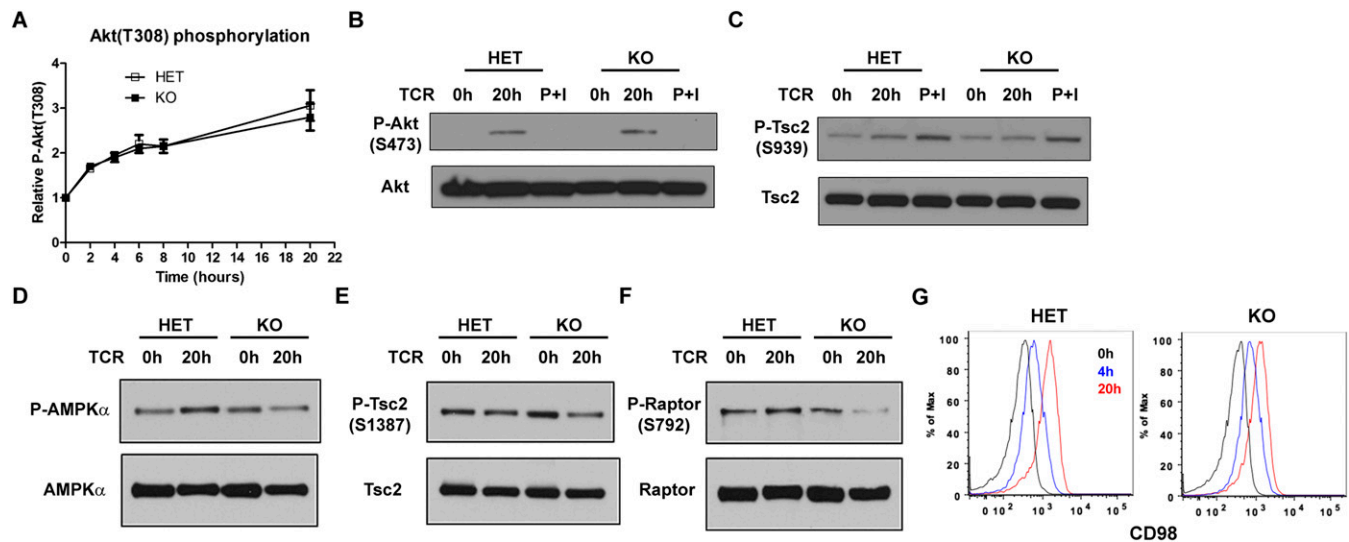

**Fig. S9.** Upstream mTORC1 regulators in dynamin 2-deficient T cells. (A) Phosphorylation of Akt on threonine 308 was measured in *Dnm2* HET and KO CD4 T cells by intracellular flow cytometry. Graph shows the mean fluorescence intensity of phosphorylated Akt in activated T cells relative to unstimulated cells (0 h). (B–F) Western blot analysis of phosphorylated Akt<sup>Ser473</sup> (B), Tsc2<sup>S939</sup> (C), AMPK $\alpha$  (D), Tsc2<sup>S1387</sup> (E), and Raptor (F) in activated CD4 T cells from *Dnm2* HET or KO mice. P + I, PMA + ionomycin. (G) Flow cytometric analysis of CD98 surface expression on naive CD4 T cells from *Dnm2* HET and KO mice. Black, blue, and red histograms represent freshly isolated cells, cells stimulated for 4 h, and cells stimulated for 20 h, respectively. All error bars represent SEM. Results are representative of or combined from two experiments.

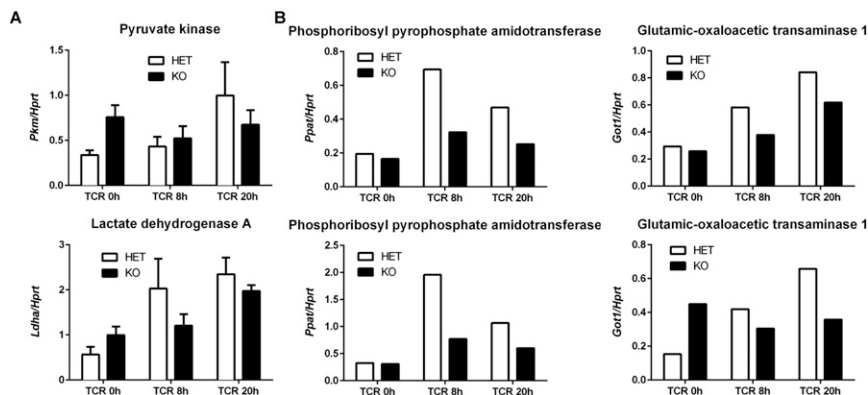

**Fig. S10.** Dynamin 2 promotes the induction of glutaminolytic enzymes in T cells. (A) Pyruvate kinase (*Pkm*) and lactate dehydrogenase A (*Ldha*) mRNA expression in CD4 T cells from *Dnm2* HET and KO mice was measured by quantitative RT-PCR ( $n = 5$ ). All error bars represent SEM. (B) mRNA expression of phosphoribosyl pyrophosphate amidotransferase (*Ppat*) and glutamic-oxaloacetic transaminase 1 (*Got1*) in *Dnm2* HET and KO CD4 T cells. Two individual experiments are shown.
